# Supplementary material
Source: PubMed Central journal article supplement (PMC7821985)
Supplement: NEJMoa2034201_data-sharing.pdf [file NEJMoa2034201_data-sharing.pdf]

## Data Sharing Statement

Sadoff J, Le Gars M, Shukarev G, et al. Interim Results of a Phase 1–2a Trial of Ad26.COV2.S Covid-19 Vaccine. *N Engl J Med*. DOI: 10.1056/NEJMoa2034201.

| Question                                                            | Authors' Response                             |
|---------------------------------------------------------------------|-----------------------------------------------|
| Will the data collected for your study be made available to others? | No                                            |
| Would you like to offer context for your decision?                  | These are interim data from an ongoing study. |
| Which data?                                                         | —                                             |
| Additional information about data                                   | —                                             |
| How or where can the data be obtained?                              | —                                             |
| When will data availability begin?                                  | —                                             |
| When will data availability end?                                    | —                                             |
| Will any supporting documents be available?                         | —                                             |
| Which supporting documents?                                         | —                                             |
| Additional information about supporting documents                   | —                                             |
| How or where can supporting documents be obtained?                  | —                                             |
| When will supporting documents availability begin?                  | —                                             |
| When will supporting documents availability end?                    | —                                             |
| To whom will data be available?                                     | —                                             |
| For what type of analysis or purpose?                               | —                                             |
| By what mechanism?                                                  | —                                             |
| Any other restrictions?                                             | —                                             |
| Additional information                                              | —                                             |

This statement was posted on January 13, 2021, at NEJM.org.
